# Supplementary material for: A retrospective observational study of osteoporosis management after a fragility fracture in primary care
Source: Arch Osteoporos. 2022 May 6;17(1):75. doi: 10.1007/s11657-022-01110-z (PMC9072526; doi:10.1007/s11657-022-01110-z)
Supplement: Supplementary file 1 — Supplementary file1 (DOCX 23 KB) [file 11657_2022_1110_MOESM1_ESM.docx]

**Supplementary Information**

**Archives of Osteoporosis**

**Title:** A Retrospective Observational Study ofOsteoporosis Management after a Fragility Fracture in Primary Care

**Authors:** Alan Bell1, David L. Kendler2, Aliya A. Khan3, Marla Shapiro4, Anne Morisset5, Jean-Pierre Leung6, Maureen Reiner7, Stephen M. Colgan7, Lubomira Slatkovska8,Millicent Packalen8

**Affiliations:**

1Department of Family and Community Medicine, University of Toronto, Toronto, ON, Canada

2Department of Medicine, Division of Endocrinology, University of British Columbia, Vancouver, BC, Canada

3Department of Medicine, Divisions of Endocrinology and Metabolism and Geriatrics, McMaster University, Hamilton, ON, Canada

4Department of Family and Community Medicine, University of Toronto, Toronto, ON, Canada

5Department of Medicine, Division of Internal Medicine, Sherbrooke University, Sherbrooke, QC, Canada

6Department of Family Medicine, University of Calgary, Calgary, AB, Canada

7Amgen Inc., California, USA

8Amgen Canada Inc., Mississauga, ON, Canada

**Corresponding author:** Millicent Packalen: mhume@amgen.com

**Supplementary Information:**

**Online Resource 1.** Clinical and Demographic Characteristics of the Index Fracture Cohort

**Online Resource 2.** BMD and Fracture Risk Assessment Results in the Full Index Fracture Cohort and Patients on Osteoporosis Treatment at Their Index Fracture Date

**Online Resource 1. Clinical and Demographic Characteristics of the Index Fracture Cohort**

| **Characteristic** | **% (n)** |
| --- | --- |
| **Total number of patients** | 778 |
| **Sex**  Female  Male | 80.5% (626)  19.5% (152) |
| **Agea**  Mean ± SD  Median (IQR) | 72.2 ± 10.9  73 (64-80) |
| **Province**  Alberta  British Columbia  Manitoba  New Brunswick  Ontario Quebec | 2.6% (20)  13.5% (105)  0.4% (3)  1.9% (15)  74.9% (583)  6.7% (52) |
| **Respiratory conditionsb**  Asthma  COPD | 6.7% (52)  8.4% (65) |
| **Inflammatory conditionsb**  Psoriasis  Rheumatoid arthritis  Spondyloarthritis | 1.9% (15)  3.0% (23)  3.9% (30) |
| **Cancerb** | 4.9% (38) |
| **Chronic kidney diseaseb** | 7.6% (59) |
| **Diabetesb**  Type 1 diabetes  Type 2 diabetes | 0.5% (4)  19.3% (150) |
| **Vascular eventsb**  Myocardial infarction  Stroke | 0.4% (3)  0.3% (2) |
| **Dementiab** | 3.3% (26) |
| **Index fracture by sitec**  Spine (clinical)  Radius  Hip  Ribs  Wrist  Humerus  Tarsals  Fibula  Tibia  Pelvis  Femur  Clavicle  Ulna  Knee  Scapula  Sternum | 21.5% (167)  13.5% (105)  10.9% (85)  9.8% (76)  9.8% (76)  8.5% (66)  6.8% (53)  6.7% (52)  4.1% (32)  3.6% (28)  3.3% (26)  2.3% (18)  1.8% (14)  0.3% (2)  0.3% (2)  0.3% (2) |
| **Number of subsequent fractures**  At least one  One  Two  Three | 11.1% (86)  8.7% (68)  1.9% (15)  0.4% (3) |

Values reported as % (n) unless otherwise indicated.

a n=776.

b Time frame for comorbidities was any time prior to the index fracture date.

c Percent of total number of index fracture cases (N=778) in select primary care centres across Canada from January 1, 2014 to December 1, 2016. Reported from highest to lowest number.

COPD: chronic obstructive pulmonary disease; IQR: interquartile range; SD: standard deviation.

**Online Resource 2. BMD and Fracture Risk Assessment Results in the Full Index Fracture Cohort and Patients on Osteoporosis Treatment at Their Index Fracture Date**

| **Assessment** | **Full cohort (N=778)** | **Patients on Osteoporosis Treatment at Index Date (N=215)** |
| --- | --- | --- |
|  | **% (n)a** | **% (n)a** |
| **T score ≤-2.5**  Prior to index  Post-index | 32.1% (45/140)  29.1% (55/189) | 51.5% (34/66)  46.2% (24/52) |
| **FRAX: high risk of fractureb**  Prior to index  Post-index | 50.0% (9/18)  30.0% (9/30) | 50.0% (7/14)  50.0% (2/4) |
| **FRAX: high risk of hip fractureb**  Prior to index  Post-index | 78.6% (11/14)  42.3% (11/26) | 88.9% (8/9)  50.0% (1/2) |
| **CAROC: high risk of fractureb**  Prior to index  Post-index | 30.4% (24/79)  50.0% (53/106) | 59.0% (23/39)  64.7% (22/34) |

a Data represents patients who had results available. Patients assessed prior to vs. post-index fracture were not necessarily the same patients.

b Defined as FRAX/CAROC ≥20% probability for major osteoporotic fracture or FRAX ≥3% probability for hip fracture.

BMD: bone mineral density; CAROC: Canadian Association of Radiologists and Osteoporosis Canada; FRAX: Fracture Risk Assessment Tool.
